# Supplementary material
Source: PubMed Central journal article supplement (PMC9857766)
Supplement: jamasurg-e226697-s002.pdf [file jamasurg-e226697-s002.pdf]

\*First name, last name, and suffix (if applicable) are required and will appear in PubMed.

| <b>*Group Name(s):</b>                   |                   |                              |                  |                                                                                                                             |                                          |                                                         |                                                                                            |
|------------------------------------------|-------------------|------------------------------|------------------|-----------------------------------------------------------------------------------------------------------------------------|------------------------------------------|---------------------------------------------------------|--------------------------------------------------------------------------------------------|
| <b>*First Name and Middle Initial(s)</b> | <b>*Last Name</b> | <b>*Suffix (eg, Jr, III)</b> | Academic Degrees | Institution                                                                                                                 | Location (city, state/province, country) | Role or Contribution, eg, chair, principal investigator | Group (if more than 1 Group listed in the byline) and/or Subgroup (eg, Steering Committee) |
| GUIDO                                    | COSTA             |                              | MD               | Department of Hepatobiliary and General Surgery, IRCCS Humanitas Research Hospital, Rozzano, Milan, Italy                   | ROZZANO (MI), ITALY                      | DATA COLLECTION;<br>FIRST DRAFT WRITING                 |                                                                                            |
| FLAVIO                                   | MILANA            |                              | MD               | Department of Hepatobiliary and General Surgery, IRCCS Humanitas Research Hospital, Rozzano, Milan, Italy                   | ROZZANO (MI), ITALY                      | DATA COLLECTION;<br>FIRST DRAFT WRITING                 |                                                                                            |
| FRANCESCA                                | RATTI             |                              | MD               | Hepatobiliary Surgery Division, "Vita e Salute" University, Ospedale San Raffaele IRCCS                                     | MILAN, ITALY                             | DATA COLLECTION;<br>FIRST DRAFT WRITING                 |                                                                                            |
| NADIA                                    | RUSSOLILLO        |                              | MD               | Department of General and Oncological Surgery, Mauriziano Hospital "Umberto I"                                              | TURIN, ITALY                             | DATA COLLECTION;<br>FIRST DRAFT WRITING                 |                                                                                            |
| FRANCESCO                                | RAZIONALE         |                              | MD               | Hepatobiliary Surgery Unit, Fondazione Policlinico Universitario A. Gemelli, IRCCS, Catholic University of the Sacred Heart | ROME, ITALY                              | DATA COLLECTION;<br>FIRST DRAFT WRITING                 |                                                                                            |
| ALESSANDRO                               | GIANI             |                              | MD               | School of Medicine and Surgery, University of Milano-Bicocca, San Gerardo Hospital                                          | MONZA, ITALY                             | DATA COLLECTION;<br>FIRST DRAFT WRITING                 |                                                                                            |
| FRANCESCA                                | CARISSIMI         |                              | MD               | School of Medicine and Surgery, University of Milano-Bicocca, San Gerardo Hospital                                          | MONZA, ITALY                             | DATA COLLECTION;<br>FIRST DRAFT WRITING                 |                                                                                            |
| MARIO                                    | GIUFFRIDA         |                              | MD               | Department of Medicine and Surgery, University of Parma                                                                     | PARMA, ITALY                             | DATA COLLECTION;<br>FIRST DRAFT WRITING                 |                                                                                            |

## Supplemental Online Content: Nonauthor Collaborators

\*First name, last name, and suffix (if applicable) are required and will appear in PubMed.

| *First Name and Middle Initial(s) | *Last Name      | *Suffix (eg, Jr, III) | Academic Degrees | Institution                                                                                                                                | Location (city, state/province, country) | Role or Contribution, eg, chair, principal investigator | Group (if more than 1 Group listed in the byline) and/or Subgroup (eg, Steering Committee) |
|-----------------------------------|-----------------|-----------------------|------------------|--------------------------------------------------------------------------------------------------------------------------------------------|------------------------------------------|---------------------------------------------------------|--------------------------------------------------------------------------------------------|
| VALERIO                           | DE PEPPO        |                       | MD               | Division of Hepatobiliarypancreatic Unit, IRCCS - Regina Elena National Cancer Institute                                                   | ROME, ITALY                              | DATA COLLECTION;<br>FIRST DRAFT WRITING                 |                                                                                            |
| IVAN                              | MARCHITELLI     |                       | MD               | Division of General and Hepatobiliary Surgery, Department of Surgical Sciences, Dentistry, Gynecology and Pediatrics, University of Verona | VERONA, ITALY                            | DATA COLLECTION;<br>FIRST DRAFT WRITING                 |                                                                                            |
| FRANCESCA                         | DE STEFANO      |                       | MD               | Unit of General Surgery 1, University of Pavia and Foundation IRCCS Policlinico San Matteo                                                 | PAVIA, ITALY                             | DATA COLLECTION;<br>FIRST DRAFT WRITING                 |                                                                                            |
| ZOE                               | LARGHI LAURERIO |                       | MD               | General Surgery and Organ Transplantation Unit, Sapienza University of Rome, Umberto I Polyclinic of Rome                                  | ROME, ITALY                              | DATA COLLECTION;<br>FIRST DRAFT WRITING                 |                                                                                            |
| ALESSANDRO                        | CUCCHETTI       |                       | MD, PHD          | General and Oncologic Surgery, Morgagni-Pierantoni Hospital, Department of Medical and Surgical Sciences - University of Bologna           | FORLI', ITALY                            | DATA COLLECTION;<br>FIRST DRAFT WRITING                 |                                                                                            |
| FRANCESCA                         | NOTTE           |                       | MD               | Department of General and Pediatric Surgery, Bolzano Central Hospital                                                                      | BOLZANO, ITALY                           | DATA COLLECTION;<br>FIRST DRAFT WRITING                 |                                                                                            |
| DAVIDE                            | COSOLA          |                       | MD               | Division of General Surgery, Department of Medical and Surgical Sciences, ASUGI                                                            | TRIESTE, ITALY                           | DATA COLLECTION;<br>FIRST DRAFT WRITING                 |                                                                                            |
| PIO                               | CORLEONE        |                       | MD               | Division of General Surgery, Department of Medical and Surgical Sciences, ASUGI                                                            | TRIESTE, ITALY                           | DATA COLLECTION;<br>FIRST DRAFT WRITING                 |                                                                                            |

## Supplemental Online Content: Nonauthor Collaborators

\*First name, last name, and suffix (if applicable) are required and will appear in PubMed.

| *First Name and Middle Initial(s) | *Last Name | *Suffix (eg, Jr, III) | Academic Degrees | Institution                                                                                                                                                     | Location (city, state/province, country) | Role or Contribution, eg, chair, principal investigator | Group (if more than 1 Group listed in the byline) and/or Subgroup (eg, Steering Committee) |
|-----------------------------------|------------|-----------------------|------------------|-----------------------------------------------------------------------------------------------------------------------------------------------------------------|------------------------------------------|---------------------------------------------------------|--------------------------------------------------------------------------------------------|
| ALBERTO                           | MANZONI    |                       | MD               | Department of General Surgery, Poliambulanza Foundation Hospital                                                                                                | BRESCIA, ITALY                           | DATA COLLECTION;<br>FIRST DRAFT WRITING                 |                                                                                            |
| MAURO                             | MONTUORI   |                       | MD               | Department of Surgery, Ponte San Pietro Hospital                                                                                                                | BERGAMO, ITALY                           | DATA COLLECTION;<br>FIRST DRAFT WRITING                 |                                                                                            |
| ANGELO                            | FRANCESCHI |                       | MD               | HPB Surgical Unit, San Paolo Hospital                                                                                                                           | SAVONA, ITALY                            | DATA COLLECTION;<br>FIRST DRAFT WRITING                 |                                                                                            |
| LUCA                              | SALVADOR   |                       | MD               | Department of Surgical, Oncological and Gastroenterological Science (DISCOG), University of Padua; Hepatobiliary and Pancreatic Surgery Unit - Treviso Hospital | TREVISO, ITALY                           | DATA COLLECTION;<br>FIRST DRAFT WRITING                 |                                                                                            |
| MARIA                             | CONTICCHIO |                       | MD               | Department of Hepato-Pancreatic-Biliary Surgery, Miulli Hospital                                                                                                | ACQUAVIVA DELLE FONTI (BA), ITALY        | DATA COLLECTION;<br>FIRST DRAFT WRITING                 |                                                                                            |
| MARCO                             | BRAGA      |                       | MD               | School of Medicine and Surgery, University of Milano-Bicocca, San Gerardo Hospital                                                                              | MONZA, ITALY                             | DATA COLLECTION;<br>FIRST DRAFT WRITING                 |                                                                                            |
| SILVIA                            | MORI       |                       | PHD              | Bicocca Clinical Research Office - BICRO, School of Medicine and Surgery, University of Milan-Bicocca                                                           | MONZA, ITALY                             | DATA COLLECTION;<br>FIRST DRAFT WRITING                 |                                                                                            |
